# Supplementary material for: The Impact of Infant and Toddler Care Services on the Reproductive Intentions of Women of Childbearing Age in the Context of Low Fertility in China: A Cross-Sectional Survey Study
Source: Research Square preprint supplement (doi:10.21203/rs.3.rs-6696383/v1), 2025-06-23
Supplement: Supplementary file 1 [file 02c2bb8b4eb081ac9bf35a2b.docx]

# **0-3 years old Infant and Toddler Care Parents Questionnaire**

Basic Information

1. Gender: A. Male B. Female

2. Household registration type: A. Urban B. Rural

3. Educational level: A. Middle school or below B. High school C. College D. Master’s degree or above

4. Income level: A. Below 3000 CNY B. 3000–5000 CNY C. 5000–8000 CNY D. Above 8000 CNY

Questionnaire

1. What is your relationship with the child? (Single choice)

A. Father

B. Mother

C. Other caregiver

2. Who was the primary caregiver of your child aged 0–3? (Single choice)

A. Nanny

B. Full-time mother

C. Childcare institution

D. Grandparents

3. Who do you think is the best caregiver for your child? (Single choice)

A. Nanny

B. Parents

C. Childcare institution

D. Grandparents

4. Have you or your family ever interrupted work due to lack of childcare? (Single choice)

A. No

B. Yes

5. What is the main difficulty you face in parenting? (Single choice)

A. Lack of understanding of infant development

B. Too busy with work to provide sufficient care

C. Other

D. Conflicts with elders' parenting concepts

6. What type of guidance do you most need for current parenting challenges? (Multiple choice)

A. Home health care and disease prevention

B. Recommendations and demonstrations of parent-child games

C. Daily care methods for children

D. Selection of educational toys and picture books

E. Basic first aid for families

F. Scientific parenting concepts

G. Communication skills with children

7. What aspects of your baby do you care most about? (Multiple choice)

A. Diet

B. Sleep

C. Health

D. Entertainment

E. Growth and development

F. Early education

G. Other

8. If you already have one child, what is your biggest concern about having a second child? (Single choice)

A. No concern

B. First child opposes

C. Financial burden

D. Would have to resign

E. No one to help with childcare

9. Would lack of satisfactory childcare services affect your willingness to have a second child? (Single choice)

A. No

B. Yes

10. How soon do you expect to return to work after childbirth? (Single choice)

A. 3 months

B. 6 months

C. 1 year

D. More than 2 years

11. What is the approximate monthly cost of raising your child under age 3? (Single choice)

A. Less than 2000 CNY

B. 3000 CNY

C. 4000 CNY

D. More than 5000 CNY

12. Are you willing to let your child attend childcare services? (Single choice)

A. No

B. Yes

13. What do you value most when selecting a childcare institution? (Single choice)

A. Regulated management

B. Proximity to home

C. Cost transparency

D. Living and dietary conditions

E. Early education quality

F. Other

14. If unwilling to use childcare services, what are your main concerns? (Multiple choice)

A. Fear of weak parent-child bond

B. Too expensive

C. Fear of child abuse

D. Concerns about hygiene and diet

E. Fear of accidents

F. Concerns about medical care quality

15. What are the main difficulties you encountered in choosing childcare services? (Multiple choice)

A. Cost

B. Location

C. Quality

D. Lack of slots

E. Need for special plans for special-needs children

F. Other

16. At what age do you think it is appropriate for a child to start childcare? (Single choice)

A. Below 6 months

B. 7–12 months

C. 1–2 years

D. 2–3 years

17. Where would you prefer the childcare institution to be located? (Single choice)

A. Near home

B. Near workplace

18. If your child is attending a childcare institution, what is the monthly cost? (Single choice)

A. Not attending

B. Below 1500 CNY

C. 2000 CNY

D. 2500 CNY

E. Above 3000 CNY

19. What is your acceptable monthly childcare expense? (Single choice)

A. ≤1000 CNY

B. 1001–2000 CNY

C. 2001–3000 CNY

D. Above 3000 CNY

20. If your child is in childcare, what do you care most about? (Multiple choice)

A. Food quality

B. Hygiene

C. Medical support

D. Video monitoring

E. Caregiver qualification

F. Safety responsibility

21. What types of childcare models do you think are feasible in your province? (Multiple choice)

A. Public childcare

B. Employer-based childcare

C. Home-based childcare

D. Private childcare

22. What qualifications should childcare staff possess? (Single choice)

A. Professionals (e.g., pediatricians, nurses, counselors)

B. Certified child caregivers

C. Does not matter

23. What services do you expect from current childcare institutions? (Single choice)

A. Both care and education

B. Basic care only

C. Education only

24. Where do you obtain scientific parenting knowledge? (Multiple choice)

A. Books

B. Internet

C. Healthcare staff

D. Elder family members

E. Care institutions

F. Other

25. How many children's books or picture books are in your home? (Single choice)

A. None

B. 1–10

C. 11–20

D. 21–30

E. 31–40

F. More than 40

26. How much screen time does your child have daily? (Single choice)

A. Almost none

B. 0–15 min

C. 15–30 min

D. 30–60 min

E. 1–2 hours

F. More than 2 hours

27. What types of childcare services has your child received? (Single choice)

A. None

B. Full-time

C. Half-day

D. Hourly

E. Boarding

28. What type of childcare service do you prefer? (Single choice)

A. Full-time

B. Half-day

C. Hourly

D. Boarding

29. What types of parenting support services have you used? (Multiple choice)

A. In-home guidance

B. Parent-child activities

C. Parent education lectures

D. Bulletin board/leaflets

E. Play areas

F. Online parenting platforms

G. None

30. What parenting support services do you most expect? (Multiple choice)

A. In-home guidance

B. Parent-child activities

C. Parent education lectures

D. Bulletin board/leaflets

E. Play areas

F. Online parenting platforms

G. Other

31. If you had the opportunity to attend parenting courses or lectures, what would you most want to learn? (Multiple choice, up to 3)

A. Common illness prevention and detection

B. Feeding and nutrition

C. Physical development and exercise

D. Cognitive development and training

E. Emotion regulation

F. Social skills

G. Parent-child communication

H. Behavior problems and coping

I. School readiness

J. Other
